# Supplementary material for: Ultrafast Fabrication of H2SO4, LiCl, and Li2SO4 Gel Electrolyte Supercapacitors with Reduced Graphene Oxide (rGO)-LiMnOx Electrodes Processed Using Atmospheric-Pressure Plasma Jet
Source: MDPI journal article supplement (doi:10.3390/mi14091701), 2023-08-30
Supplement: s1 [file s1]

Supplementary Material

# Ultrafast Fabrication of $\text{H}_2\text{SO}_4$ , $\text{LiCl}$ , and $\text{Li}_2\text{SO}_4$ Gel Electrolyte Supercapacitors with Reduced Graphene Oxide (rGO)- $\text{LiMnO}_x$ Electrodes Processed Using Atmospheric-Pressure Plasma Jet

Pei-Ling Lan <sup>1,2</sup>, I-Chih Ni <sup>3</sup>, Chih-I Wu <sup>3,4</sup>, Cheng-Che Hsu <sup>5</sup>, I-Chun Cheng <sup>3</sup> and Jian-Zhang Chen <sup>1,2,4,\*</sup>

<sup>1</sup> Graduate Institute of Applied Mechanics, National Taiwan University, Taipei City 10617, Taiwan; r11543037@ntu.edu.tw

<sup>2</sup> Advanced Research Center for Green Materials Science and Technology, National Taiwan University, Taipei City 10617, Taiwan

<sup>3</sup> Department of Electrical Engineering, Graduate Institute of Photonics and Optoelectronics, National Taiwan University, Taipei City 10617, Taiwan; ichihni@ntu.edu.tw (I.-C.N.); chihwu@ntu.edu.tw (C.-I.W.); iccheng@ntu.edu.tw (I.-C.C.)

<sup>4</sup> Graduate School of Advanced Technology, National Taiwan University, Taipei City 10617, Taiwan

<sup>5</sup> Department of Chemical Engineering, National Taiwan University, Taipei City 10617, Taiwan; chsu@ntu.edu.tw

\* Correspondence: jchen@ntu.edu.tw; Tel.: +886-2-3366-5694

## Supplementary Information

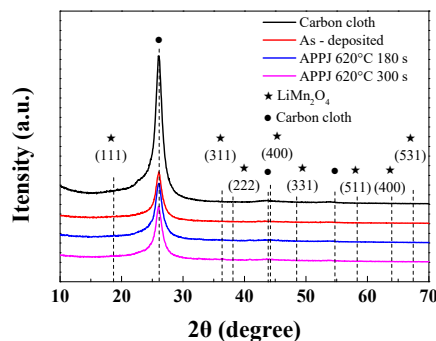

Figure S1. XRD patterns of rGO- $\text{LiMnO}_x$  on carbon cloth.

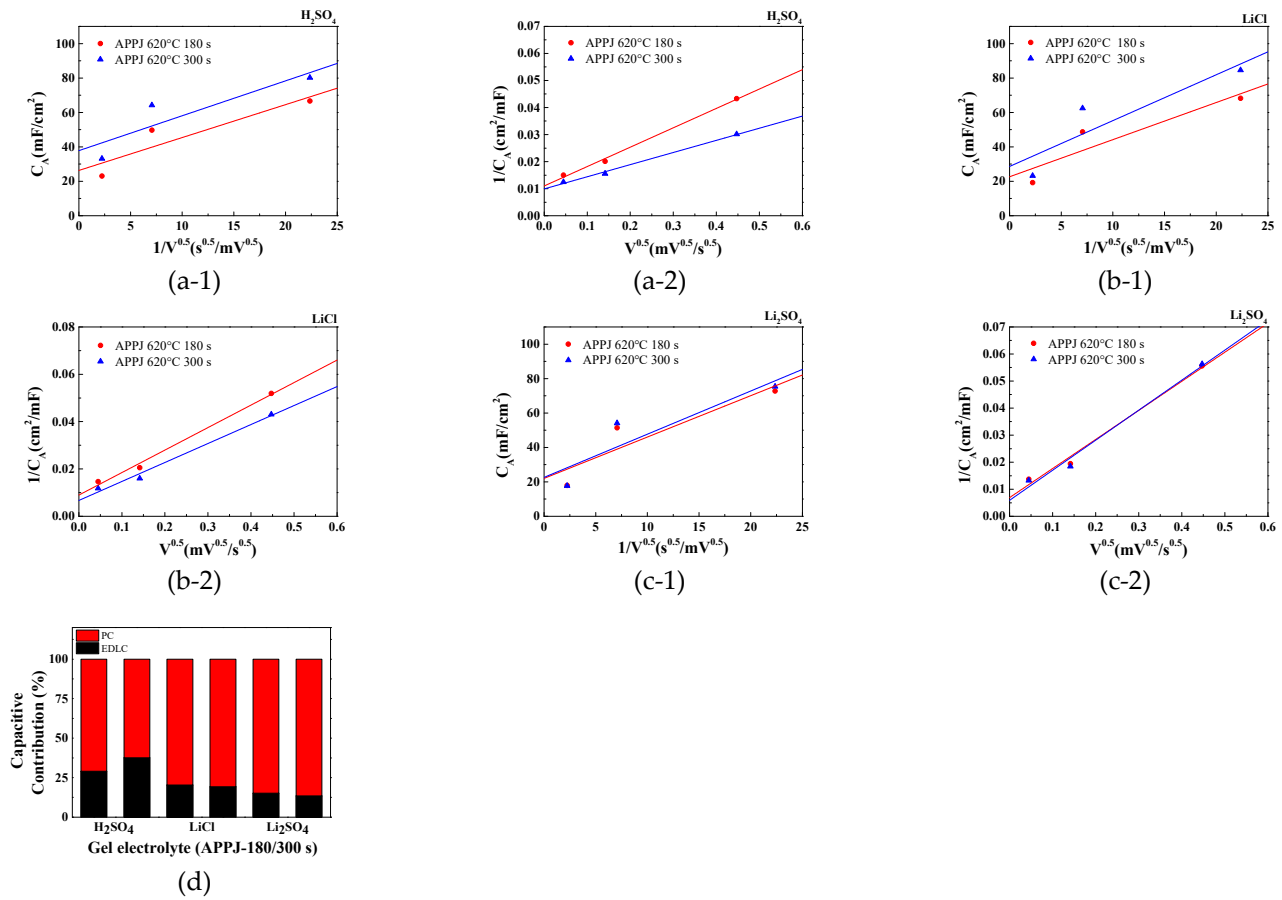

**Figure S2.** Trasatti plots generated for HSCs using 1 M (a) H<sub>2</sub>SO<sub>4</sub>, (b) LiCl, and (c) Li<sub>2</sub>SO<sub>4</sub> gel electrolytes. Plots of (a-1, b-1, c-1)  $C_A$  vs.  $1/v^{0.5}$  and (a-2, b-2, c-2)  $1/C_A$  vs.  $v^{0.5}$ . (d) Capacitance contributions ratio of PC/EDLC.

**Table S1.** Capacitance contributions of HSCs.

|                                 |              | $C_{\text{total}}$<br>(mF/cm <sup>2</sup> ) | $C_{\text{out}}$<br>(mF/cm <sup>2</sup> ) | $C_{\text{in}}$ (mF/cm <sup>2</sup> ) | Capacitive<br>Contribution<br>(EDLC:PC) (%) |
|---------------------------------|--------------|---------------------------------------------|-------------------------------------------|---------------------------------------|---------------------------------------------|
| H <sub>2</sub> SO <sub>4</sub>  | APPJ - 180 s | 90.74                                       | 26.32                                     | 64.42                                 | 29.0:71.0                                   |
|                                 | APPJ - 300 s | 100.70                                      | 37.82                                     | 62.88                                 | 37.6:62.4                                   |
| LiCl                            | APPJ - 180 s | 111.48                                      | 22.65                                     | 88.83                                 | 20.3:79.7                                   |
|                                 | APPJ - 300 s | 149.03                                      | 28.64                                     | 120.39                                | 19.2:80.8                                   |
| Li <sub>2</sub> SO <sub>4</sub> | APPJ - 180 s | 144.51                                      | 22.03                                     | 122.48                                | 15.2:84.8                                   |
|                                 | APPJ - 300 s | 169.20                                      | 22.62                                     | 146.58                                | 13.4:86.6                                   |

**Table S2.** Advantages of the work compared to reported electrolyte supercapacitors.

| Advantages                                                  | Description                                                                                                                                                                                                                             |
|-------------------------------------------------------------|-----------------------------------------------------------------------------------------------------------------------------------------------------------------------------------------------------------------------------------------|
| Novel material combination                                  | By screen-printing pastes containing rGO and LiCl-Mn(NO <sub>3</sub> ) <sub>2</sub> ·4H <sub>2</sub> O onto carbon cloth substrate with nitrogen APPJ processing, a novel material combination with superior performance is introduced. |
| Potential advantages of choosing different gel electrolytes | The interaction between gel electrolyte and electrode materials leads to higher energy storage and faster energy release, resulting in superior energy density                                                                          |

|           |                                                                                                                                           |
|-----------|-------------------------------------------------------------------------------------------------------------------------------------------|
|           | and power density compared to reported supercapacitors.                                                                                   |
| Stability | Nitrogen APPJ treatment enhances interface stability between materials, thereby extending the operational lifespan of the supercapacitor. |

**Table S3.** Comparison of electrochemical properties of rGO-LiMnO<sub>x</sub>/ rGO-MnO<sub>x</sub> based supercapacitors.

| Electrode materials                                               | Electrolyte                             | Performance                | Cycling stability                       | Reference |
|-------------------------------------------------------------------|-----------------------------------------|----------------------------|-----------------------------------------|-----------|
| Carbon cloth/ rGO-LiMnO <sub>x</sub>                              | PVA/ 1M H <sub>2</sub> SO <sub>4</sub>  | 57.76 mF/cm <sup>2</sup>   | 82.10% after 20 mV/s for 1000 cycles    | This work |
| Carbon cloth/ rGO-LiMnO <sub>x</sub>                              | PVA/ 1M LiCl                            | 59.95 mF/cm <sup>2</sup>   | 76.09% after 20 mV/s for 1000 cycles    | This work |
| Carbon cloth/ rGO-LiMnO <sub>x</sub>                              | PVA/ 1M Li <sub>2</sub> SO <sub>4</sub> | 86.42 mF/cm <sup>2</sup>   | 76.86% after 20 mV/s for 100 cycles     | This work |
| Aluminum foil/ rGO-LiMnO <sub>2</sub>                             | 1M LiPF <sub>6</sub>                    | 185.60 mAh g <sup>-1</sup> | 80.97% after 100 cycles                 | [1]       |
| Aluminum foil/ LiMnO <sub>2</sub>                                 | 1M LiPF <sub>6</sub>                    | 140.8 mAh g <sup>-1</sup>  | 53.53% after 100 cycles                 | [1]       |
| RGO wrapped LiMn <sub>2</sub> O <sub>4</sub> nano-rods            | 1M LiPF <sub>6</sub>                    | 143.5 mAh g <sup>-1</sup>  | 97% after 50 cycles                     | [2]       |
| Carbon cloth/ rGO-MnO <sub>x</sub>                                | PVA/ 1M H <sub>2</sub> SO <sub>4</sub>  | 57.01 mF/cm <sup>2</sup>   | 84.41% after 200 mV/s for 10,000 cycles | [3]       |
| Carbon cloth/ LiMn <sub>2</sub> O <sub>4</sub>                    | 1M Li <sub>2</sub> SO <sub>4</sub>      | 78.46 mC cm <sup>-2</sup>  | 104.53% after 20 mV/s for 1000 cycles   | [4]       |
| Nickel foam/ rGO-Mn <sub>3</sub> O <sub>4</sub>                   | 1M Na <sub>2</sub> SO <sub>4</sub>      | 457 F g <sup>-1</sup>      | 91.60% after 5000 cycles                | [5]       |
| Nickel foam/ rGO-MnO <sub>x</sub>                                 | 1M Na <sub>2</sub> SO <sub>4</sub>      | 214 F g <sup>-1</sup>      | N/A                                     | [6]       |
| defect induced rGO-MnO <sub>x</sub>                               | 1M Na <sub>2</sub> SO <sub>4</sub>      | 264 F g <sup>-1</sup>      | 153% after 10000 cycles                 | [7]       |
| Nickel foam/ rGO-MnO <sub>x</sub> /Mn <sub>3</sub> O <sub>4</sub> | 0.5M Na <sub>2</sub> SO <sub>4</sub>    | 442 F g <sup>-1</sup>      | N/A                                     | [8]       |

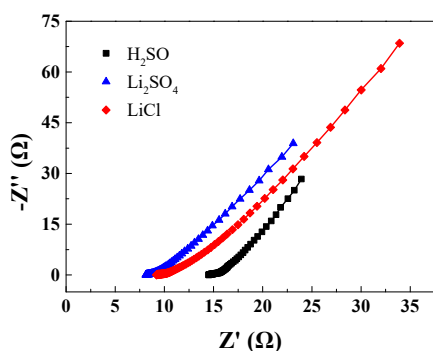

**Figure S3.** Comparison of EIS results for H<sub>2</sub>SO<sub>4</sub>, LiCl, and Li<sub>2</sub>SO<sub>4</sub> gel electrolyte HSCs treated with APPJ for 300 s.

## References

1. Tian, Y.; Qiu, Y.; Liu, Z.; Wei, X.; Cao, H. LiMnO<sub>2</sub>@rGO nanocomposites for high-performance lithium-ion battery cathodes. *Nanotechnology* **2021**, *32*, 015402, <https://doi.org/10.1088/1361-6528/abb48c>.
2. He, J.; Chen, Y.; Li, P.; Fu, F.; Liu, J.; Wang, Z. Facile fabrication of GRO wrapped LiMn<sub>2</sub>O<sub>4</sub> nanorods as a cathode with enhanced specific capacity. *RSC Advances* **2015**, *5*, 80063–80068. <https://doi.org/10.1039/C5RA09783E>.
3. Shah, H.U.; Wang, F.; Javed, M.S.; Shaheen, N.; Saleem, M.; Li, Y. Hydrothermal synthesis of reduced graphene oxide-Mn<sub>3</sub>O<sub>4</sub> nanocomposite as an efficient electrode materials for supercapacitors. *Ceramics International* **2018**, *44*, 3580–3584, <https://doi.org/10.1016/j.ceramint.2017.11.062>.
4. Zhao, X.; Yang, H.; Hou, Y.; Gbologah, L.; Zhu, L.; Wang, Y. Systematically controlled synthesis of rGO/nano-MnO<sub>x</sub> materials for supercapacitors. *Progress in Natural Science: Materials International* **2019**, *29*, 504–510, <https://doi.org/10.1016/j.pnsc.2019.09.003>.
5. Prakash, D.; Manivannan, S. Defect induced RGO-MnO<sub>x</sub> hybrid electrodes for supercapacitor applications. *AIP Conference Proceedings* **2019**, *2115*, <https://doi.org/10.1063/1.5113420>.
6. Mokhtarnejad, M.; Ribeiro, E.L.; Mukherjee, D.; Khomami, B. 3D printed interdigitated supercapacitor using reduced graphene oxide-MnO<sub>(x)</sub> /Mn<sub>(3)</sub>O<sub>(4)</sub> based electrodes. *RSC Adv.* **2022**, *12*, 17321–17329, <https://doi.org/10.1039/d2ra02009b>.

**Disclaimer/Publisher's Note:** The statements, opinions and data contained in all publications are solely those of the individual author(s) and contributor(s) and not of MDPI and/or the editor(s). MDPI and/or the editor(s) disclaim responsibility for any injury to people or property resulting from any ideas, methods, instructions or products referred to in the content.
